# Supplementary material for: Hybrid modeling of drop breakage in pulsed sieve tray extraction columns
Source: Frontiers journal article supplement (doi:10.3389/fceng.2023.1274349), 2023-11-08
Supplement: Data_Sheet_1.PDF [file Data_Sheet_1.PDF]

## Supplementary Material

# Hybrid Modeling of Drop Breakage in Pulsed Sieve Tray Extraction Columns

Andreas Palmtag<sup>1</sup>, Johannes Rousselli<sup>1</sup>, Henning Gröschl<sup>1</sup>, Andreas Jupke<sup>1\*</sup>

1) Fluid Process Engineering (AVT.FVT), RWTH Aachen University, Forckenbeckstraße 51, D-52074 Aachen, Germany, Tel.: +49 241 80-95490, [www.avt.rwth-aachen.de](http://www.avt.rwth-aachen.de), e-mail: [andreas.jupke@avt.rwth-aachen.de](mailto:andreas.jupke@avt.rwth-aachen.de)

\*

Andreas  
andreas.jupke@avt.rwth-aachen.de

Correspondence:  
Jupke

## 1 Supplementary Tables

**Table 1: Parametrization of Garthe's breakage model.**

| Solvent system | $d_h$ [mm] | $c_1$ | $c_2$ | $c_3$ | $c_4$ |
|----------------|------------|-------|-------|-------|-------|
| TW             | 2          | 1.64  | -0.18 | 1.91  | 0.55  |
|                | 4          | 4.8   | 0.27  | 1.35  | 4.31  |
| TWA            | 2          | 3.81  | 0.61  | 1.11  | 3.47  |
|                | 4          | 4.75  | 0.14  | 1.11  | 4.35  |
| BW             | 2          | 1.33  | 0.03  | 2.03  | 0.42  |
|                | 4          | 2.00  | -0.07 | 1.61  | 0.95  |
| BWA            | 2          | 2.49  | 0.27  | 0.95  | 1.77  |
|                | 4          | 2.18  | -0.33 | 1.62  | 1.15  |

## 2 Error Metric

The root mean-squared error  $e_{\text{rmse}}$  is commonly used when assessing the deviation between a number  $n_u$  of predicted  $u$  and experimental values  $\hat{u}$  (Brockkötter et al., 2020). The  $e_{\text{rmse}}$  is averaged over all  $n_u$  data sets, thus it might be disproportionally affected by outliers (Dahmen & Reusken, 2022). Nevertheless,  $e_{\text{rmse}}$  is a common measure of the residue in machine learning (ML) since it provides the information on the residue in its most simple form, e.g., a small  $e_{\text{rmse}}$  indicates a good model, a large  $e_{\text{rmse}}$  quantifies the average deviation in the same dimension as the predicted quantity. Commonly, a distinction is made between the training  $e_{\text{rmse}}$ , the value minimized during model development, and test  $e_{\text{rmse}}$ , a score assessing the prediction of the ML model on data not used during model development (James & Witten, 2013).

In contrast to  $e_{\text{rmse}}$ , the coefficient of determination  $e_{\text{R}^2}$  is a relative measure of the residue.  $e_{\text{R}^2}$  is common in regression analysis, and it can be interpreted as a comparison between the deviation  $\hat{u} - u$  to the average of the experimental values  $\bar{u}$ . At best, the  $e_{\text{R}^2}$  is close to 1, whereas, a  $e_{\text{R}^2} < 0$  indicates that the experimental values are better represented by  $\bar{u}$  than by the predictions  $u$ . (Cramer & Kamps, 2017; James & Witten, 2013)

The pull metric  $e_{\text{pull}}$  is not commonly used in the extraction research. Therefore, we would like to demonstrate the pull metric based on a simple example. We consider a database consisting of  $n_u = 100$  experimental values  $\hat{u}$  and the according predictions  $u$  by a model. The  $n_u$  experimental values represent independent experimental data sets and not replicates of one experiment. For each of the  $n_u$  entries in the database, e.g., measurement-predictions pairs, the deviation  $\hat{u} - u$  is calculated and standardized by the measurement uncertainty  $\sigma_e$ , yielding the  $e_{\text{pull}}$  for each entry (compare with eq. 4-3). The resulting  $n_u$  pull values  $e_{\text{pull}}$  represent a population which can be visualized in a histogram (see Figure 1). The resulting distribution is characterized by the mean  $\bar{e}_{\text{pull}}$  and its standard deviation  $\tilde{e}_{\text{pull}}$ . Considering the numerical values, a good model is characterized by a pull distribution with a mean close to zero ( $\bar{e}_{\text{pull}} = 0$ ) and a standard deviation smaller than one ( $\tilde{e}_{\text{pull}} < 1$ ). Graphically, a good distribution has its center close  $\bar{e}_{\text{pull}} = 0$  and most entries within the  $-1 \leq e_{\text{pull}} \leq 1$  (indicated by dashed lines in Figure 1), indicating that most entries in the database have a deviation that does not exceed the measurement uncertainty. It is important to note that the numerical values for  $\bar{e}_{\text{pull}}$  and  $\tilde{e}_{\text{pull}}$  might not suffice to assess the accuracy of the prediction, since a multimodal distribution might also result in allegedly good values for  $\bar{e}_{\text{pull}}$  and  $\tilde{e}_{\text{pull}}$ . Therefore, we also considered the graphical representation of the pull distribution to assess the prediction quality of our models.

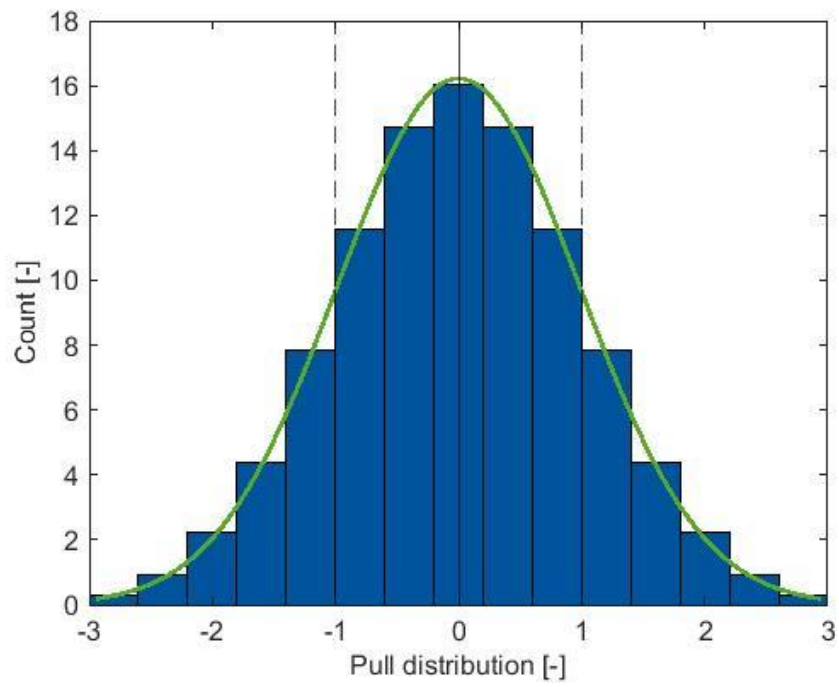

Figure 1: Exemplary Pull distribution.

### 3 Specification of the Soft- and Hardware

All simulations have been conducted on a desktop computer with an Intel Core i7-7700K @4.2GHz processor, which has 4 cores and 8 GB of RAM. An overview over the python and Matlab libraries is given in Table 2.

Table 2: Specification of the software used in this work.

| Name                                  | Type                            | Version        |
|---------------------------------------|---------------------------------|----------------|
| Python                                | Programming Language            | 3.10.8. 64-bit |
| numpy                                 | Python library                  | 1.23.4         |
| scipy                                 | Python library                  | 1.9.3          |
| pandas                                | Python library                  | 1.5.1          |
| XlsxWriter                            | Python library                  | 3.0.3          |
| joblib                                | Python library                  | 1.2.0          |
| scikit-learn                          | Python library                  | 1.1.3          |
| openpyxl                              | Python library                  | 3.0.10         |
| torch                                 | Python library                  | 1.13.0         |
| colorama                              | Python library                  | 0.4.6          |
| fluids                                | Python library                  | 1.0.22         |
| mlxtend                               | Python library                  | 0.21.0         |
| seaborn                               | Python library                  | 0.12.1         |
| Matlab <sup>TM</sup>                  | Software                        | R2022b         |
| Optimization Toolbox                  | Library (Matlab <sup>TM</sup> ) | 9.4            |
| Curve Fitting Toolbox                 | Library (Matlab <sup>TM</sup> ) | 3.8            |
| Parallel Computing Toolbox            | Library (Matlab <sup>TM</sup> ) | 7.7            |
| Deep Learning Toolbox                 | Library (Matlab <sup>TM</sup> ) | 14.5           |
| Statistics & Machine Learning Toolbox | Library (Matlab <sup>TM</sup> ) | 12.4.          |

## 4 References

- Brockkötter, J., Cielanga, M., Weber, B., & Jupke, A. (2020). Prediction and Characterization of Flooding in Pulsed Sieve Plate Extraction Columns Using Data-Driven Models. *Industrial & Engineering Chemistry Research*, 59(44), 19726–19735. <https://doi.org/10.1021/acs.iecr.0c03282>
- Cramer, E., & Kamps, U. (2017). *Grundlagen der Wahrscheinlichkeitsrechnung und Statistik: Eine Einführung für Studierende der Informatik, der Ingenieur- und Wirtschaftswissenschaften* (4., korrigierte und erweiterte Auflage). *Springer-Lehrbuch*. Springer Spektrum.
- Dahmen, W., & Reusken, A. (2022). *Numerik für Ingenieure und Naturwissenschaftler* (3. Auflage). *Springer-Lehrbuch*. Springer. <https://doi.org/10.1007/978-3-540-76493-9>
- James, G., & Witten, D. (2013). *An introduction to statistical learning: with applications in R*.
